# Supplementary material for: Improving Pediatric Basic Life Support Performance Through Blended Learning With Web-Based Virtual Patients: Randomized Controlled Trial
Source: PubMed Central journal article supplement (PMC4526972; doi:10.2196/jmir.4141), 2015-07-02
Supplement: jmir_v17i7e162_app2.pdf [file jmir_v17i7e162_app2.pdf]

## Adherence to algorithm scoring

| Task                                | 2 points                             | 1 point                                | 0 points |
|-------------------------------------|--------------------------------------|----------------------------------------|----------|
| 1. Safe approach                    | done at correct algorithmic position | done but at wrong algorithmic position | not done |
| 2. Asses responsiveness             |                                      |                                        |          |
| 3. Shout for help                   |                                      |                                        |          |
| 4. Open airway                      |                                      |                                        |          |
| 5. Assess breathing                 |                                      |                                        |          |
| 6. Initial rescue breaths           |                                      |                                        |          |
| 7. Assess signs of life/circulation |                                      |                                        |          |
| 8. (4) cycles of CPR                |                                      |                                        |          |
| 9. Emergency call                   |                                      |                                        |          |
