# Supplementary material for: Improving Pediatric Basic Life Support Performance Through Blended Learning With Web-Based Virtual Patients: Randomized Controlled Trial
Source: PubMed Central journal article supplement (PMC4526972; doi:10.2196/jmir.4141), 2015-07-02
Supplement: jmir_v17i7e162_app3.pdf [file jmir_v17i7e162_app3.pdf]

## Temporal measures scoring

| Task                                                                | Calculated/estimated ideal                                                                                                                                                                                             | 2 points                      | 1 point                                               | 0 points                    |
|---------------------------------------------------------------------|------------------------------------------------------------------------------------------------------------------------------------------------------------------------------------------------------------------------|-------------------------------|-------------------------------------------------------|-----------------------------|
| <b>Initial 5 rescue breaths</b>                                     | 5*(1 s inspiration + 1 s expiration)<br>$\cong$<br><u>10 s</u>                                                                                                                                                         | 9–11 s<br><br>( $\pm 10\%$ )  | 8–9 s<br><i>or</i><br>11–12 s<br><br>( $\pm 20\%$ )   | <8<br><i>or</i><br>>12 s    |
| <b>Assess circulation</b>                                           | ---                                                                                                                                                                                                                    | <10 s                         | ---                                                   | >10 s                       |
| <b>4 cycles CPR</b><br>(excluding initial rescue breaths)           | 4*15 chest compressions at 100 per<br>minute (36 s)<br>+<br>3*2 rescue breaths (12 s)<br>+<br>2 s for transitions<br>$\cong$<br><u>50 s</u>                                                                            | 45–55 s<br><br>( $\pm 10\%$ ) | 40–45 s<br><i>or</i><br>56–60 s<br><br>( $\pm 20\%$ ) | <40 s<br><i>or</i><br>>60 s |
| <b>Total time of sequence</b><br>from approach to<br>emergency call | Safe approach and responsiveness<br>assessment, shout for help ( $\cong 10$ s)<br>+<br>Initial 5 rescue breaths (10 s)<br>+<br>Circulation check ( $\cong 10$ s)<br>+<br>4 cycles CPR (50 s)<br>$\cong$<br><u>80 s</u> | 72–88 s<br><br>( $\pm 10\%$ ) | 64–71 s<br><i>or</i><br>89–96 s<br><br>( $\pm 20\%$ ) | <64 s<br><i>or</i><br>>96 s |
