# Supplementary material for: Improving Pediatric Basic Life Support Performance Through Blended Learning With Web-Based Virtual Patients: Randomized Controlled Trial
Source: PubMed Central journal article supplement (PMC4526972; doi:10.2196/jmir.4141), 2015-07-02
Supplement: jmir_v17i7e162_app4.pdf [file jmir_v17i7e162_app4.pdf]

## Performance quality scoring

| Task                          | 2 points                                                                                                                                                                                | 1 point                                                     | 0 points                      |
|-------------------------------|-----------------------------------------------------------------------------------------------------------------------------------------------------------------------------------------|-------------------------------------------------------------|-------------------------------|
| <b>Safe approach</b>          | Looked around for any danger                                                                                                                                                            | Done too flighty                                            | Not done or not ratable       |
| <b>Assess responsiveness</b>  | Called loud <i>and</i> stimulated                                                                                                                                                       | Only called <i>or</i> stimulated                            | Not done or very poor         |
| <b>Open airway</b>            | <b>Infant:</b> head in neutral position, chin lift<br><b>Toddler:</b> head tilt, chin lift                                                                                              | Partially done incorrectly                                  | Not done or very poor         |
| <b>Assess breathing</b>       | <b>Look, listen and feel</b> (own cheek over patients' mouth, hand on patients' upper abdomen or chest, looks downward to chest)                                                        | Does not assess <i>all three</i> dimensions                 | Not done or very poor         |
| <b>Initial rescue breaths</b> | <b>Five sufficient</b> rescue breaths with visible chest rise and <b>correct head position</b>                                                                                          | Partially done insufficiently                               | Not done or very poor         |
| <b>Assess circulation</b>     | <b>Complete inspection</b> of signs of life (movements) and feels <b>carotid pulse</b>                                                                                                  | Feels other pulse than carotid, does not look for movements | Not done or very poor         |
| <b>CPR</b>                    | <b>CV ratio</b><br>- 15 chest compressions in alteration with two rescue breaths                                                                                                        | Partially done incorrectly                                  | Not done or very poor         |
|                               | <b>Chest compression procedure</b><br>- Pressure point lower half of sternum<br>- Compression at least one-third of the depth of the chest<br>- Complete release after each compression | Partially done incorrectly                                  | Not done or very poor         |
|                               | <b>Chest compression technique:</b><br><b>Infant:</b> two or three fingers<br><b>Toddler:</b> one or two hands                                                                          | Partially done incorrectly                                  | Not done or very poor         |
|                               | <b>Rescue breaths</b><br>Sufficient with visible chest rise and correct head position                                                                                                   | Partially done insufficiently                               | Not done or very poor         |
|                               | <b>Efficient transitions</b><br>between chest compressions and rescue breaths, e.g. positioning, fixed head position during chest compressions                                          | Few interruptions during CPR                                | Many interruptions during CPR |
